# Supplementary material for: Practical microwave-induced hydrothermal synthesis of rectangular prism-like CaTiO3
Source: Royal Society of Chemistry journal article supplement (doi:10.1039/c3ce27040h), 2013-01-01
Supplement: c3ce27040h.pdf [file c3ce27040h.pdf]

## Supplementary Information

### **Practical microwave-induced hydrothermal synthesis of rectangular-prism-like $\text{CaTiO}_3$**

*L.M. Lozano Sánchez<sup>a</sup>, Soo-Wohn Lee,<sup>b</sup> Tohoru Sekino<sup>c</sup> and V. Rodríguez-González<sup>\*a</sup>*

\* To whom correspondence should be addressed

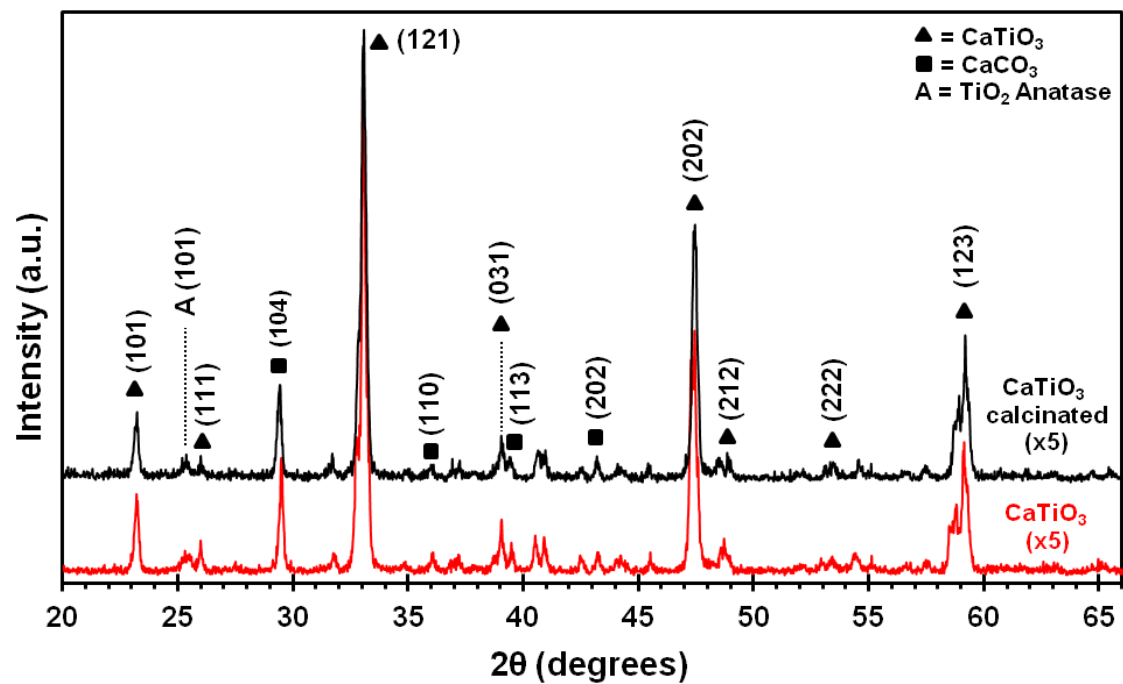

**Figure S1.** XRD patterns for CaTiO<sub>3</sub> cuboid samples and CaTiO<sub>3</sub> annealed at 450°C for 4 hr. It can be inferred that cuboids are thermally stable and that no further crystallinity is achieved with the thermal treatment.

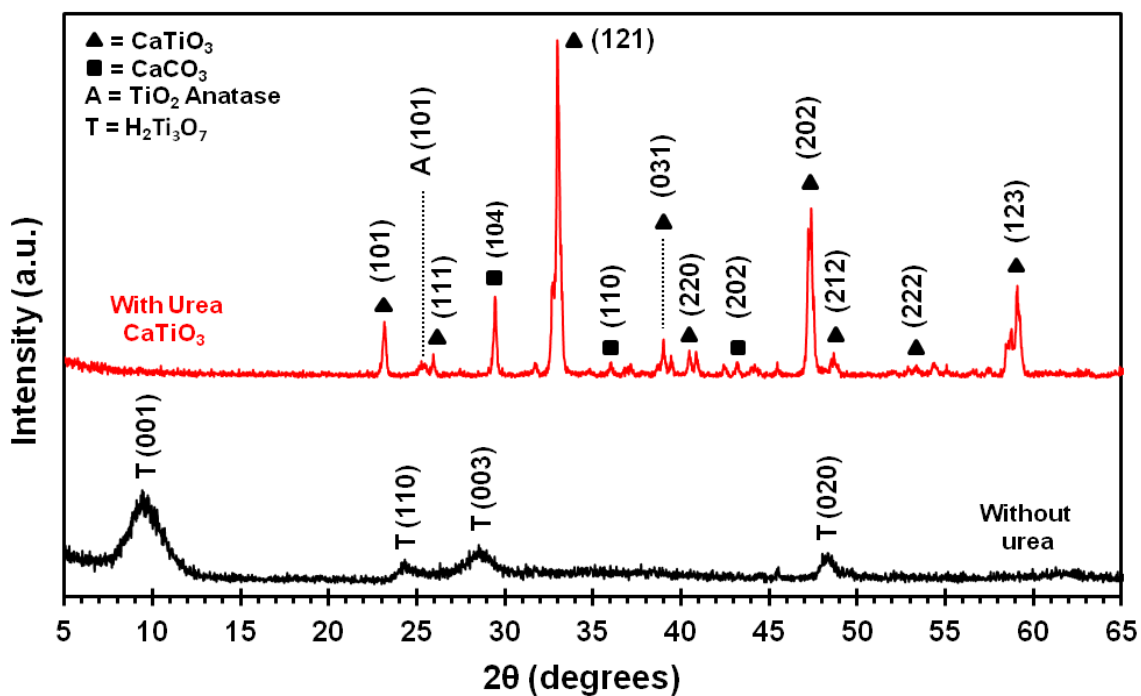

**Figure S2.** Comparative XRD patterns of samples taken under the same conditions in the microwave-assisted hydrothermal process, obtained to analyze the effect of the urea therein. It can be seen that the reaction that did not contain urea (in black above) resulted in the formation of  $\text{H}_2\text{Ti}_3\text{O}_7$  nanotubes and, as mentioned in the text, the use of urea results in the synthesis of cuboid-like particles of  $\text{CaTiO}_3$ .

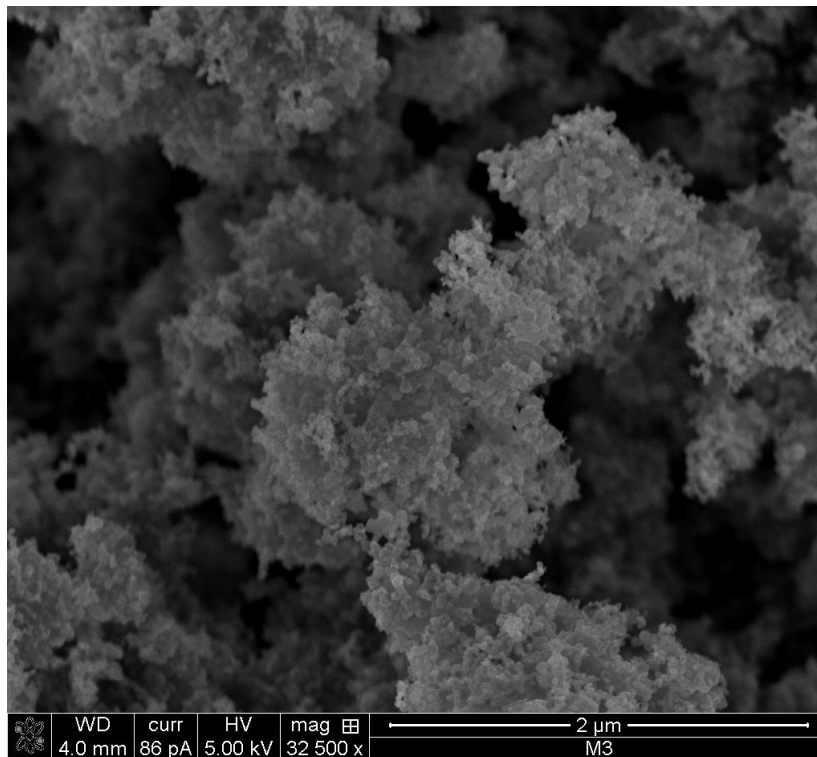

**Figure S3.** SEM image of bulk TiO<sub>2</sub> P25, used as a precursor in the microwave-assisted hydrothermal synthesis of CaTiO<sub>3</sub>. It can be inferred that the method proposed in this work achieves a complete transformation of the particles into a homogeneous cuboid morphology.

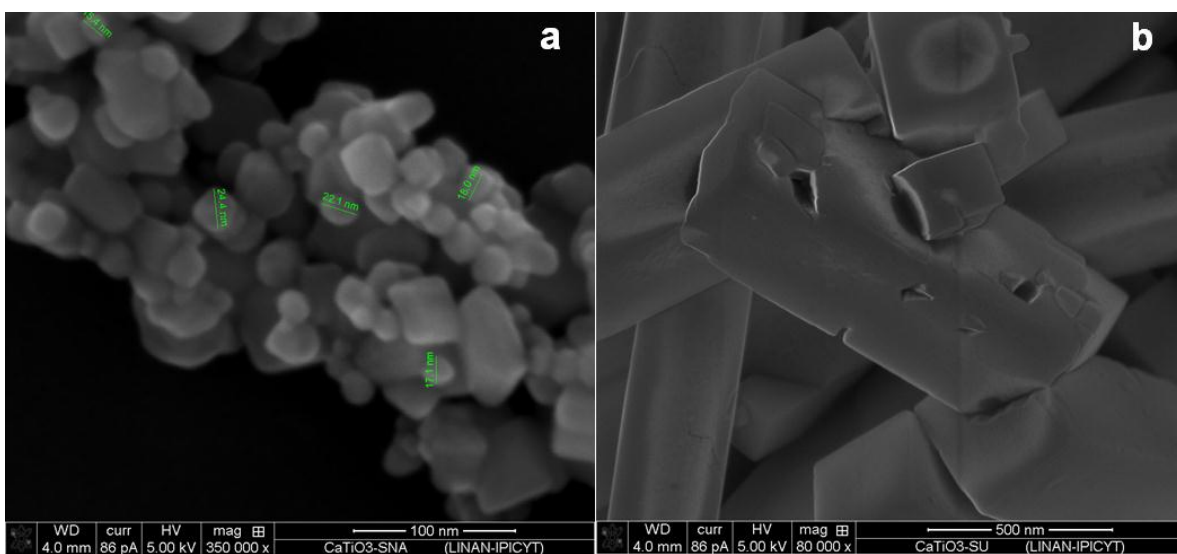

**Figure S4.** SEM image of  $\text{CaTiO}_3$  samples synthesized a) without using NaOH, and b) without using urea.

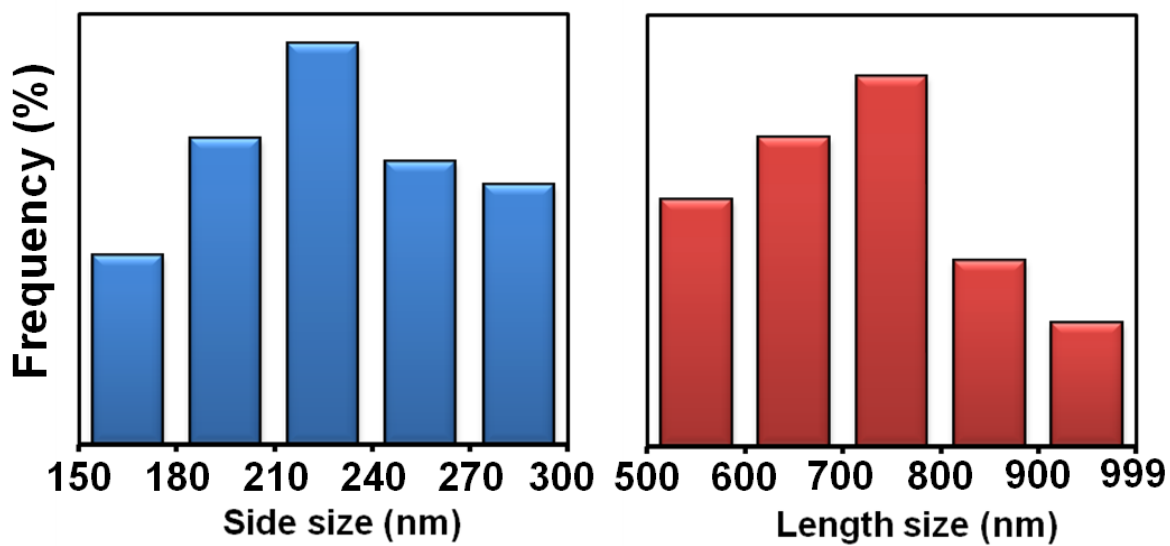

**Figure S5.** Histograms of dimensional distribution of  $\text{CaTiO}_3$  particles, where the average dimension is 225 nm x 715 nm.

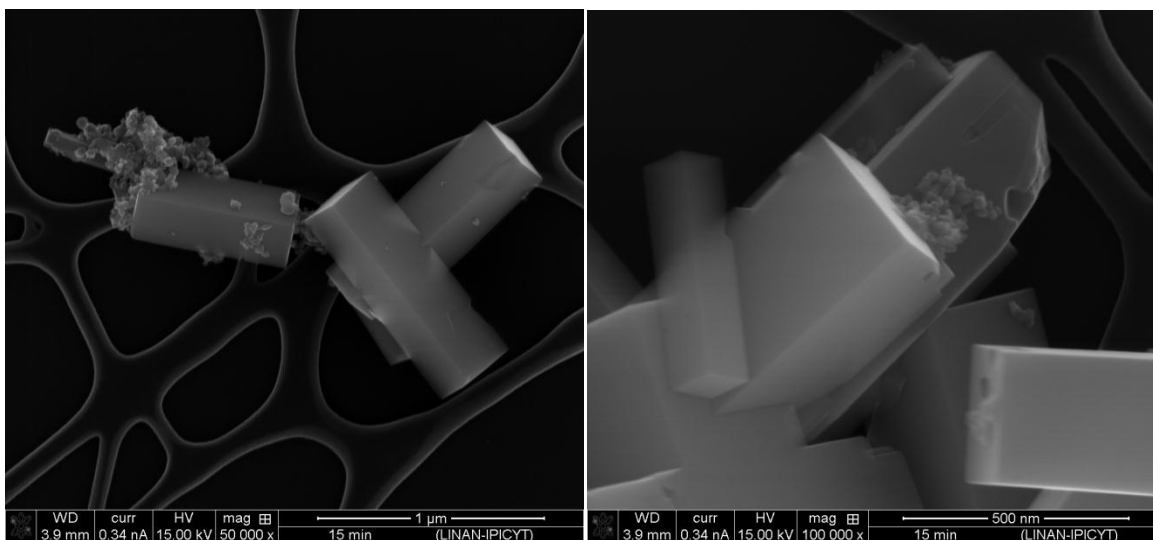

**Figure S6.** SEM images of CaTiO<sub>3</sub> after 15 minutes of reaction in the microwave reactor. Bulk particles are still present, and CaTiO<sub>3</sub> cuboids are not completely well-formed, since some significant superficial defects are observed within the particles.

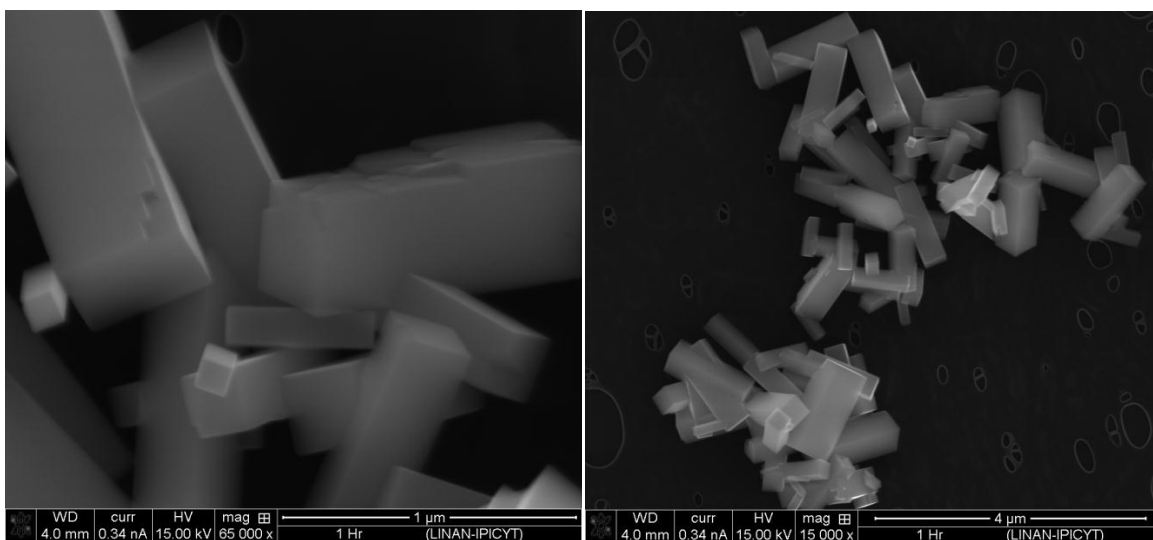

**Figure S7.** SEM images of CaTiO<sub>3</sub> after 1 hour of reaction in the microwave reactor. Even after this longer reaction time, defects are still present on the surface of the cuboids. The size distribution is significantly variable.

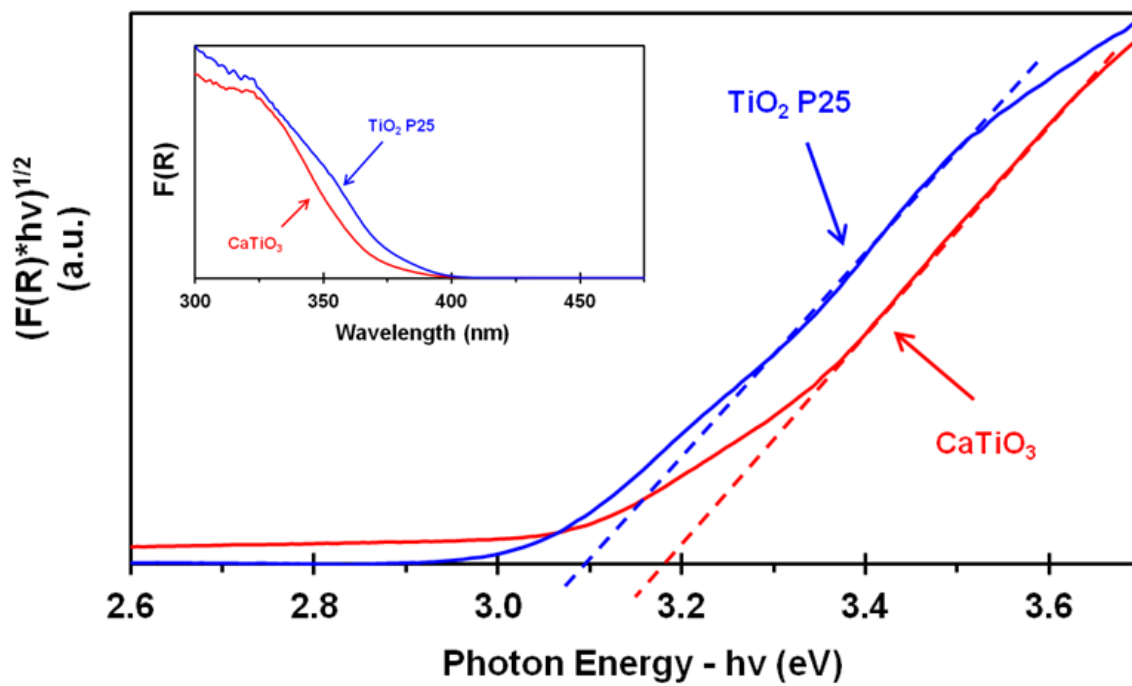

**Figure S8.** UV-Vis spectra using the Tauc plot model to obtain the band gap energy ( $E_g$ ) for  $TiO_2$  P25 and perovskite  $CaTiO_3$ . An increase in the value of the forbidden energy band of the  $CaTiO_3$  sample compared to that of the  $TiO_2$  P25 is indicated by the intersection of the dashed line with the blue and red curves.



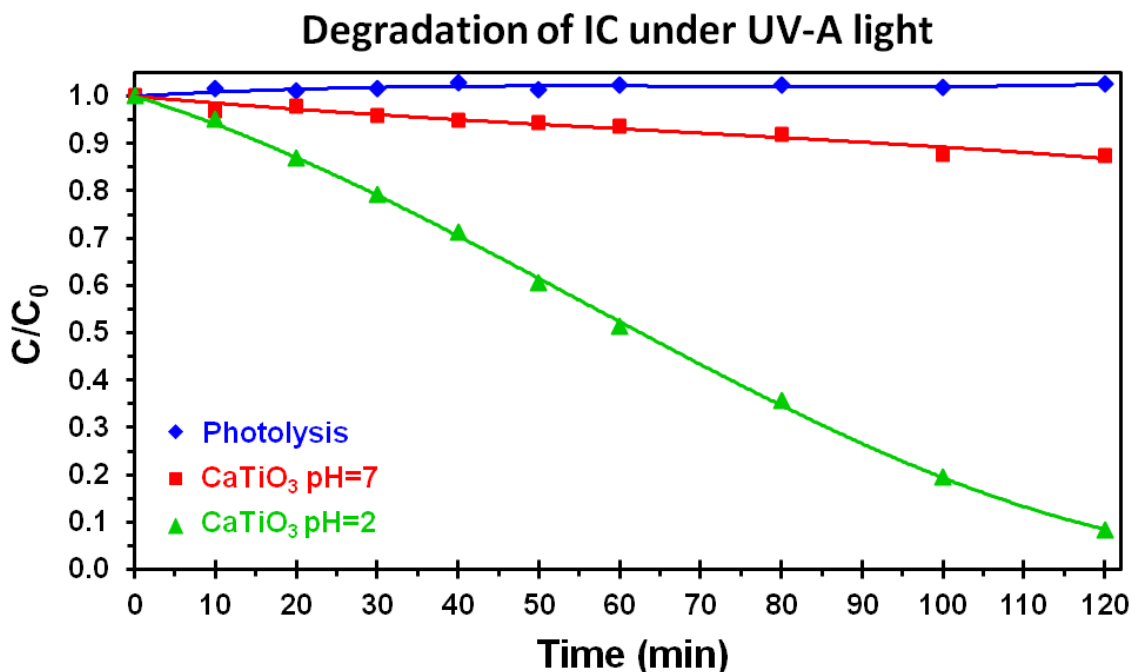

**Figure S9.** The evaluation of the photocatalytic activity of CaTiO<sub>3</sub> sample through the degradation of indigo carmine dye (IC) was performed in a photocatalytic reactor comprising a 20 W lamp of UV-A light irradiation, and a glass reactor of 125 mL capacity placed on a grill with magnetic stirring. 100 mL of IC solution (30 ppm) were placed in the reactor (Pyrex flat Crystallizing Dish), and 100 mg of photocatalyst were then added. The suspension was stirred at 300 rpm. The experiments were performed at room temperature for 120 min (2 hours), and aliquots of 1 mL were collected immediately after each of the 10-minutes of irradiation intervals and analyzed with an UV-Vis spectrophotometer using a 1 mL-capacity quartz cell. The decrease in the concentration of indigo carmine was observed from the characteristic absorption at  $\lambda=610$  nm. In order to analyze the pH effect of the solution in the degradation of IC, H<sub>2</sub>SO<sub>4</sub> was used to perform experiments at acid pH values.

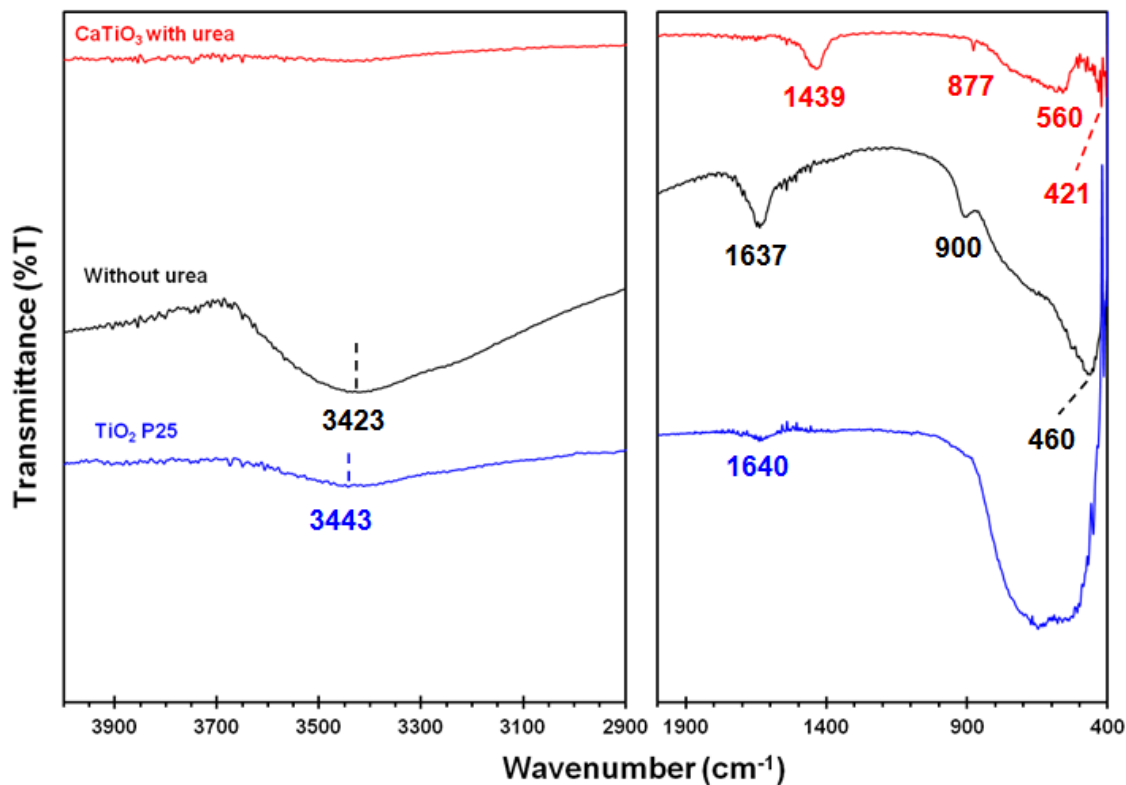

**Figure S10.** FTIR spectra of (a) perovskite  $\text{CaTiO}_3$  synthesized by a microwave-assisted hydrothermal process using urea, for particles with prism-like morphology, and (b) without using urea corresponding to the nanotubes, presented for comparison to show an effect of urea in the process, (c) FTIR spectrum of  $\text{TiO}_2$  P25 used as precursor for the reaction. Infrared (IR) spectra were recorded in transmittance mode on a JASCO FTIR-460 plus spectrophotometer. The samples were diluted (10% w/w) in dry KBr and scanned over a frequency range of  $400\text{--}4000\text{ cm}^{-1}$  at room temperature.

In order to further confirm the bonding structure of the calcium titanate cuboids, an FTIR spectrum was recorded Fig. S6 shows the FTIR spectrum at  $400\text{--}4000\text{ cm}^{-1}$  of the calcium titanate. The broad band at  $2900\text{--}3700\text{ cm}^{-1}$  with the transmission peak of  $3423\text{ cm}^{-1}$  is the characteristic stretching vibration of hydroxylate ( $\text{--OH}$ ) attributable to water and the bending band is observed at  $1650\text{ cm}^{-1}$ . The transmission peak located at  $877\text{ cm}^{-1}$  is related to a symmetric stretching vibration along  $\text{Ca--O--Ca}$  bonds. The transmission band at  $1439\text{ cm}^{-1}$  is assigned to the asymmetrical stretching vibration of the hydroxylate ( $\text{OH--Ca}$ ). The transmission band peak at  $560\text{ cm}^{-1}$  is associated with the vibration of the  $\text{Ca--O}$  bonds of the calcium titanate cuboids.<sup>2</sup> A broad and strong band, characteristic of alkaline titanates, appears at  $460\text{ cm}^{-1}$ . The transmission band at  $421\text{ cm}^{-1}$  is assigned to the asymmetrical stretching vibration of the  $\text{Ti--O}$  (from  $\text{TiO}_3^{2-}$  groups)<sup>3</sup>

- 1 S. Beg, S. Haneef, and N. A. S. Al-Areqi, *Ioncs.*, 2010, **16**, 239.
- 2 J. Urban, W. S. Yun, Q. Gu and H. Park, *CrystEngComm. Soc.*, 2012, **14**, 4262.
- 3 C. Peng, Z. Hou, C. Zhang, G. Li, H. Lian, Z. Cheng and J. Lin, *Opt. Express.*, 2010, **18**, 7543.

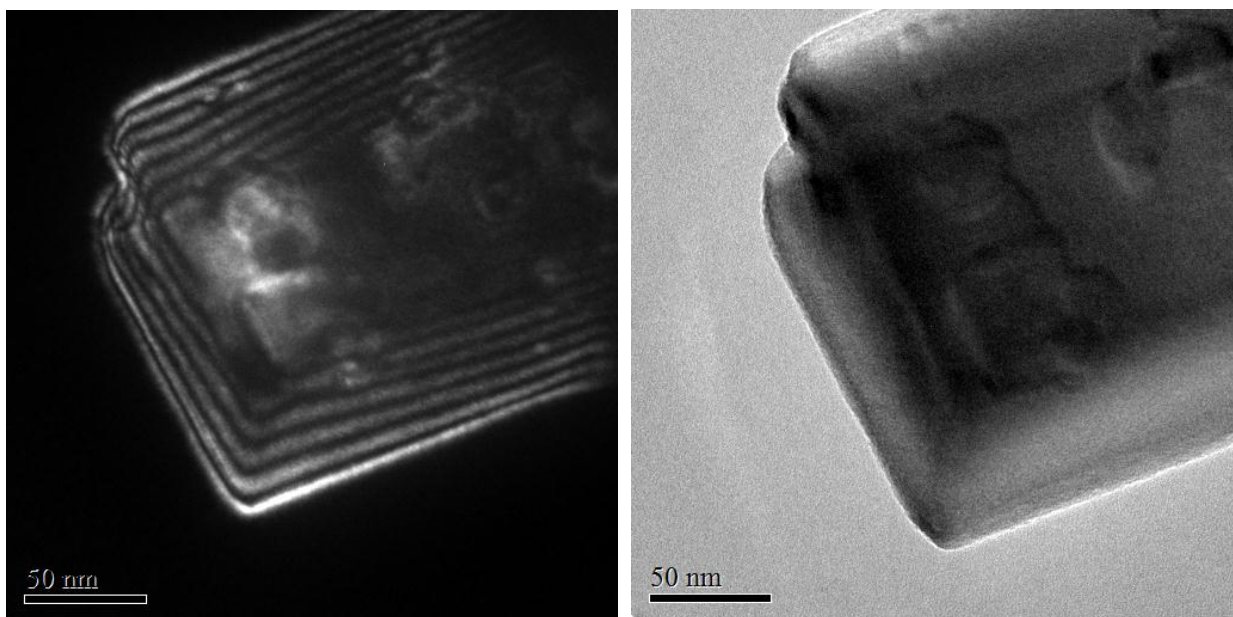

**Figure S11.** TEM observations in weak-beam dark-field imaging. The layers appear as so called nanosheets. Also, a TEM image of the same particle in bright field is included that confirms the layered structure.
